# Supplementary material
Source: MDPI journal article supplement (https://www.mdpi.com/2073-4360/5/4/1203)
Supplement: s1 [file s1]

# Supplementary Information

## 1. Calibration Curve of Methyl Blue Solution

**Table S1.** Absorbance of methyl blue solution with different concentrations.

| C (mg/L) | 0 | 10    | 20    | 30    | 50    | 70    | 100   | 200  |
|----------|---|-------|-------|-------|-------|-------|-------|------|
| Abs.     | 0 | 0.055 | 0.095 | 0.125 | 0.199 | 0.271 | 0.375 | 0.73 |

The standard curve between concentration and absorbance can be expressed as Equation (1),

$$A = 0.036C + 0.016 \quad (1)$$

where  $A$  is absorbance of the methyl blue solution,  $C$  is the concentration of the methyl blue solution. The  $R^2$  for the linear relation is 0.9991.

**Figure S1.** Calibration curve of methyl blue solution.

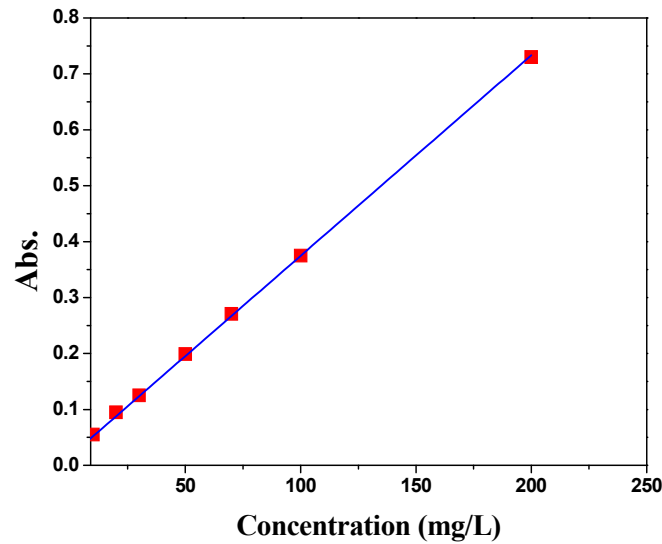

## 2. Calibration Curve of Cr(VI) Solution

**Table S2.** Absorbance of Cr(VI) solution with different concentrations.

| C (mg/L) | 0 | 3    | 6    | 9    | 12   | 15   |
|----------|---|------|------|------|------|------|
| Abs.     | 0 | 0.26 | 0.55 | 0.79 | 1.06 | 1.32 |

The standard curve between concentration and absorbance can be expressed as Equation (2),

$$A = 0.088C + 0.003 \quad (2)$$

where  $A$  is absorbance of the Cr(VI) solution,  $C$  is the concentration of the Cr(VI) solution. The  $R^2$  for the linear relation is 0.9995.

**Figure S2.** Calibration curve of Cr(VI) solution.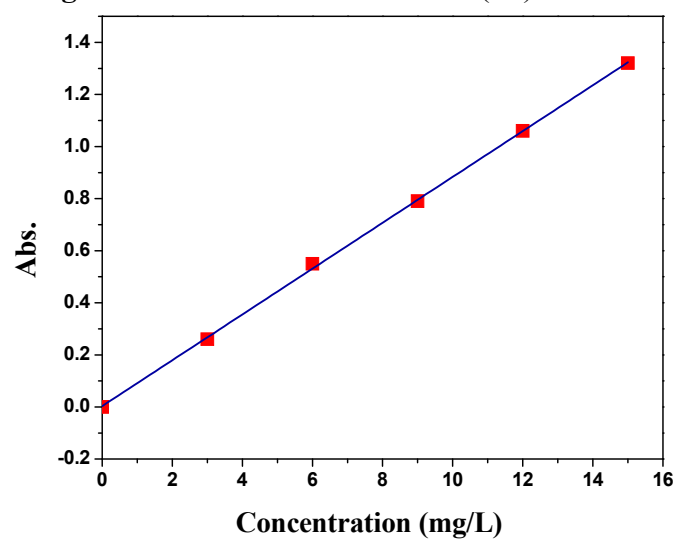

© 2013 by the authors; licensee MDPI, Basel, Switzerland. This article is an open access article distributed under the terms and conditions of the Creative Commons Attribution license (<http://creativecommons.org/licenses/by/3.0/>).
